# Supplementary material for: The effect of dimerization on the activation and conformational dynamics of adenosine A1 receptor
Source: Royal Society of Chemistry journal article supplement (doi:10.1039/c9cp04060a), 2019-01-01
Supplement: c9cp04060a1.pdf [file c9cp04060a1.pdf]

## **Supporting Information**

# The effect of dimerization on the activation of adenosine A<sub>1</sub> receptor

*Yang Li,<sup>a</sup> Mukuo Wang,<sup>a</sup> Na Gao,<sup>a,b</sup> Dongmei Li,<sup>\*,a</sup> and Jianping Lin<sup>\*,a,b</sup>*

### **Contents:**

- **Fig. S1.** Schematic representation of the NECA-A<sub>1</sub>R-M, NECA-A<sub>1</sub>R and dNECA-A<sub>1</sub>R systems used in the MD simulations.
- **Fig. S2.** Structure of A<sub>1</sub>R and NECA in the NECA-A<sub>1</sub>R system. A<sub>1</sub>R is shown in a cartoon model, and NECA in the binding site is shown in a stick model.
- **Fig. S3.** Definitions of the collective variables CV<sub>1</sub> and CV<sub>2</sub> for metaMD. CV<sub>1</sub> (shown with gray dash line) is the distance between the centers of mass (COMs) of NECA and the seven transmembrane helical bundles of A<sub>1</sub>R along the direction perpendicular to membrane (Z-direction), and CV<sub>2</sub> (shown with green dash line) is the distance between the COMs of NECA and residues Thr91<sup>3,36</sup>, Phe171<sup>ECL2</sup>, Glu172<sup>ECL2</sup>, Thr277<sup>7,42</sup> and His278<sup>7,43</sup>.
- **Fig. S4.** Time dependences of RMSD of the nonhydrogen atoms of protein of each protomers with respect to the initial X-ray crystallographic structure for the (A) apo-A<sub>1</sub>R, (B) NECA-A<sub>1</sub>R and (C) dNECA-A<sub>1</sub>R system. Time dependences of RMSD of NECA inside the orthosteric binding site was measured with respect to its docking pose coordinates for the (E) apo-A<sub>1</sub>R, (F) NECA-A<sub>1</sub>R and (G) dNECA-A<sub>1</sub>R system in the cMD simulation.
- **Table S1.** Averaged values and standard deviations of the RMSD of the nonhydrogen atoms of protein of each protomers with respect to the initial X-ray crystallographic structure, and the

RMSD of NECA inside the orthosteric binding site was measured with respect to its docking pose coordinates for each protomer over the three parallel cMD trajectories.

- **Fig. S5.** 2D Structure of NECA.
- **Table S2.** Averaged distances and standard deviations between the hydroxyl oxygen of the Thr91<sup>3.36</sup> side chain and the N<sup>5'</sup> of NECA, the centers of the phenyl group of Phe171<sup>ECL2</sup> and the purine group of NECA, the carbonyl oxygen of Glu172<sup>ECL2</sup> and the N<sup>6</sup> of NECA, the imidazole  $\epsilon$ -nitrogen of His251<sup>6.52</sup> and the O<sup>5'</sup> of NECA, hydrogen bond Hbond1 between the acylamino  $\delta$ 1-oxygen of Asn254<sup>6.55</sup> and the N<sup>6</sup> of NECA (Hbond1), the acylamino  $\delta$ 2-nitrogen of Asn254<sup>6.55</sup> and the N<sup>7</sup> of NECA (Hbond2), the distance between the hydroxyl oxygen of Thr277<sup>7.42</sup> and the O<sup>3'</sup> of NECA and the distance between the imidazole  $\epsilon$ -nitrogen of His278<sup>7.43</sup> and O<sup>2'</sup> of NECA in the three parallel GaMD simulations.
- **Fig. S6.** Time dependences of RMSD of NECA respect to the relative to the docking pose for the NECA-A<sub>1</sub>R-M system in the cMD simulation.
- **Table S3.** Average number of water molecules in the G-protein binding crevice of the inactive and active states of A<sub>1</sub>R.
- **Fig. S6.** Time dependences of (A) TM3-TM6 distance, (B) RMSD of the DRY motif relative to the inactive starting structure, (C) the N--O distance between the guanidinium of Arg105<sup>3.50</sup>/Arg108<sup>3.53</sup> and the carboxyl of Glu229<sup>6.30</sup> and (D) RMSD of the KxxK motif relative to the inactive starting structure in the GaMD simulation of the second NECA-A<sub>1</sub>R trajectory.
- **Fig. S7.** Time dependences of (A) TM3-TM6 distance, (B) RMSD of the DRY motif relative to the inactive starting structure, (C) the N--O distance between the guanidinium of

Arg105<sup>3.50</sup>/Arg108<sup>3.53</sup> and the carboxyl of Glu229<sup>6.30</sup> and (D) RMSD of the KxxK motif relative to the inactive starting structure in the GaMD simulation of the third NECA-A<sub>1</sub>R trajectory.

- **Fig. S8.** Time dependences of (A) TM3-TM6 distance, (B) RMSD of the DRY motif relative to the inactive starting structure, (C) the N--O distance between the guanidinium of Arg105<sup>3.50</sup>/Arg108<sup>3.53</sup> and the carboxyl of Glu229<sup>6.30</sup> and (D) RMSD of the KxxK motif relative to the inactive starting structure in the GaMD simulation of the second dNECA-A<sub>1</sub>R trajectory.
- **Fig. S9.** Time dependences of (A) TM3-TM6 distance, (B) RMSD of the DRY motif relative to the inactive starting structure, (C) the N--O distance between the guanidinium of Arg105<sup>3.50</sup>/Arg108<sup>3.53</sup> and the carboxyl of Glu229<sup>6.30</sup> and (D) RMSD of the KxxK motif relative to the inactive starting structure in the GaMD simulation of the third dNECA-A<sub>1</sub>R trajectory.
- **Fig. S10.** Potential of mean force (PMF) calculated for the TM3-TM6 distance vs. the RMSD of the DRY motif relative to the inactive starting structure for (A) P<sub>1</sub> and (B) P<sub>2</sub> of the apo-A<sub>1</sub>R system. Time dependences of the (C) TM3-TM6 distance, (D) RMSD of the DRY motif relative to the inactive starting structure, (E) N--O distance between the guanidinium of Arg105<sup>3.50</sup>/Arg108<sup>3.53</sup> and the carboxyl of Glu229<sup>6.30</sup> and (F) RMSD of the KxxK motif relative to the inactive starting structure in the GaMD simulation of the apo-A<sub>1</sub>R system.
- **Fig. S11.** Dynamic cross-correlations map of the apo-A<sub>1</sub>R system in the GaMD simulations.
- **Fig. S12.** Dynamic cross-correlations map of the (A) NECA-A<sub>1</sub>R based on the snapshots in 110-140 ns of the second NECA-A<sub>1</sub>R trajectory, (B) NECA-A<sub>1</sub>R based on the snapshots in

200-230 ns of the third NECA-A<sub>1</sub>R trajectory, (C) dNECA-A<sub>1</sub>R based on the snapshots in 130-160 ns of the second dNECA-A<sub>1</sub>R trajectory, and (D) dNECA-A<sub>1</sub>R based on the snapshots in 230-260 ns of the second NECA-A<sub>1</sub>R trajectory in the GaMD simulations.

- **Table S4.** The highly correlated residues with the absolute values of correlation coefficients larger than 0.6 for the receptor in the NECA-A<sub>1</sub>R and dNECA-A<sub>1</sub>R systems.
- **Table S5.** The networks in the intracellular sides of the P<sub>1</sub> and P<sub>2</sub> in the GaMD simulation of the second NECA-A<sub>1</sub>R and dNECA-A<sub>1</sub>R trajectory.
- **Table S6.** The networks in the intracellular sides of the P<sub>1</sub> and P<sub>2</sub> in the GaMD simulation of the third NECA-A<sub>1</sub>R and dNECA-A<sub>1</sub>R trajectory.
- **Table S7.** Averaged values and standard deviations of the distances between COMs of P<sub>1</sub> and P<sub>2</sub> in the apo-A<sub>1</sub>R, NECA-A<sub>1</sub>R, and dNECA-A<sub>1</sub>R systems over the three parallel GaMD trajectories.

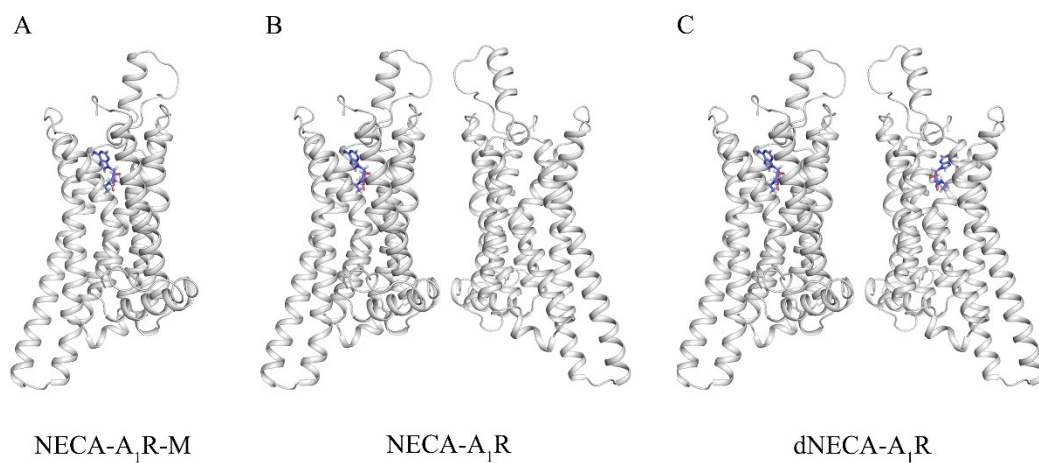

**Fig. S1.** Schematic representation of the NECA-A<sub>1</sub>R-M, NECA-A<sub>1</sub>R and dNECA-A<sub>1</sub>R systems used in the MD simulations.

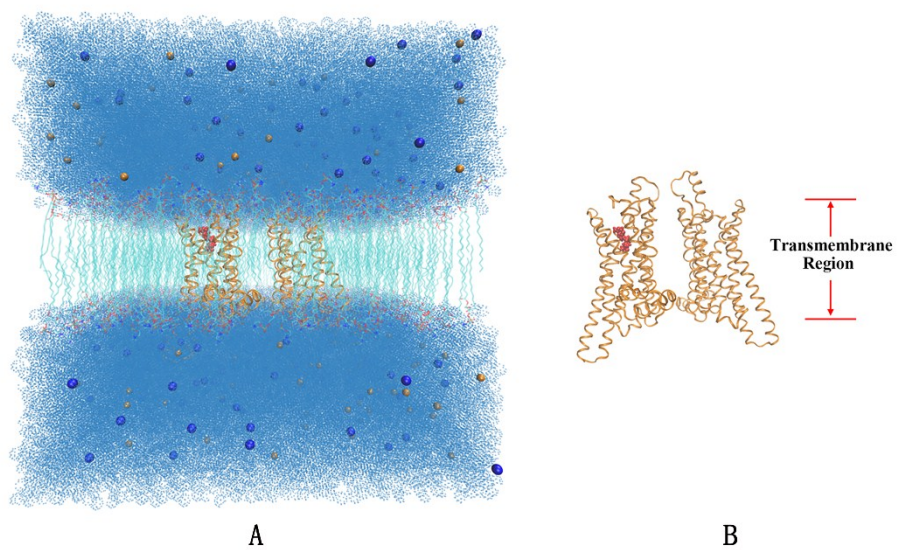

**Fig. S2.** Structure of A<sub>1</sub>R and NECA in the NECA-A<sub>1</sub>R system. A<sub>1</sub>R is shown in a cartoon model, and NECA in the binding site is shown in a stick model.

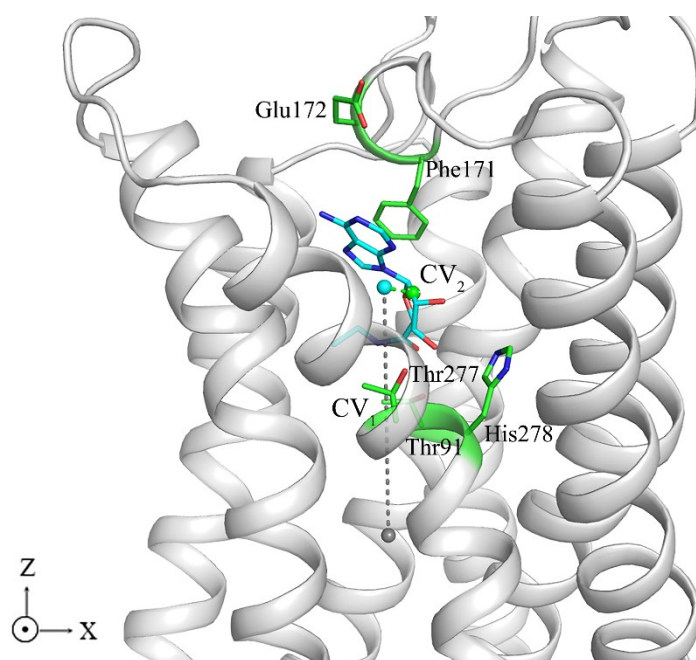

**Fig. S3.** Definitions of the collective variables  $CV_1$  and  $CV_2$  for metaMD.  $CV_1$  (shown with gray dash line) is the distance between the centers of mass (COMs) of NECA and the seven transmembrane helical bundles of  $A_1R$  along the direction perpendicular to membrane (Z-direction), and  $CV_2$  (shown with green dash line) is the distance between the COMs of NECA and residues Thr91<sup>3.36</sup>, Phe171<sup>ECL2</sup>, Glu172<sup>ECL2</sup>, Thr277<sup>7.42</sup> and His278<sup>7.43</sup>.

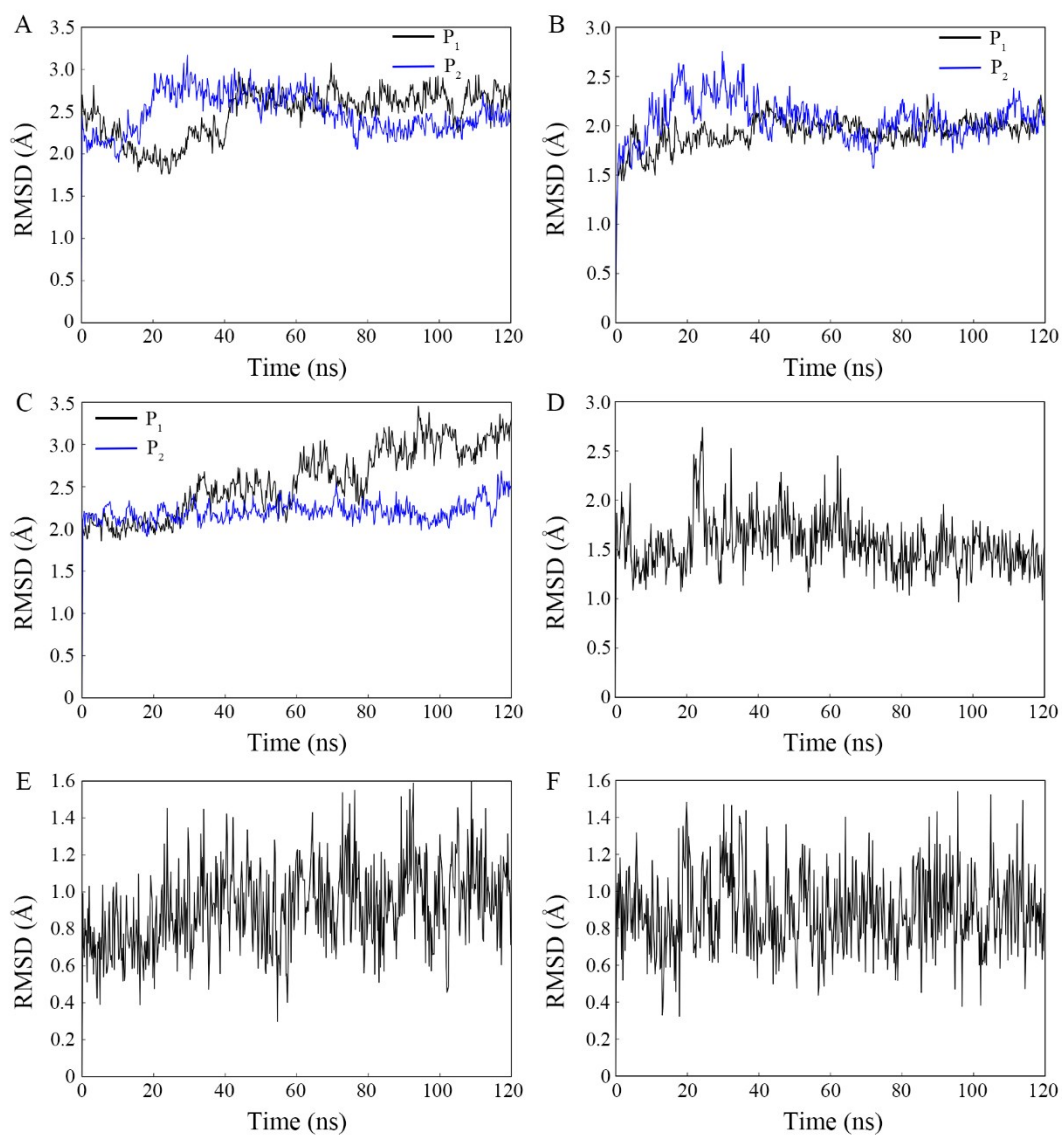

**Fig. S4.** Time dependences of RMSD of the protein of each protomers with respect to the initial X-ray crystallographic structure for the (A) apo-A<sub>1</sub>R, (B) NECA-A<sub>1</sub>R and (C) dNECA-A<sub>1</sub>R system. Time dependences of RMSD of NECA inside the orthosteric binding site was measured with respect to its docking pose coordinates for the (E) apo-A<sub>1</sub>R, (F) NECA-A<sub>1</sub>R and (G) dNECA-A<sub>1</sub>R system in the cMD simulation.



**Table S1.** Averaged values and standard deviations of the RMSD of the protein of each protomers with respect to the initial X-ray crystallographic structure, and the RMSD of NECA inside the orthosteric binding site was measured with respect to its docking pose coordinates for each protomer over the three parallel cMD trajectories.

| System                                             | RMSD of Protein<br>(Å) |      | RMSD of NECA<br>(Å) |     |
|----------------------------------------------------|------------------------|------|---------------------|-----|
|                                                    | Average                | SD   | Average             | SD  |
| <b>P<sub>1</sub> of apo-A<sub>1</sub>R (cMD)</b>   | 2.4                    | 0.3  | -                   |     |
| <b>P<sub>2</sub> of apo-A<sub>1</sub>R (cMD)</b>   | 2.4                    | 0.1  | -                   |     |
| <b>P<sub>1</sub> of NECA-A<sub>1</sub>R (cMD)</b>  | 1.9                    | 0.1  | 1.4                 | 0.1 |
| <b>P<sub>2</sub> of NECA-A<sub>1</sub>R (cMD)</b>  | 2.3                    | 0.2  | -                   |     |
| <b>P<sub>1</sub> of dNECA-A<sub>1</sub>R (cMD)</b> | 2.7                    | 0.6  | 1.0                 | 0.3 |
| <b>P<sub>2</sub> of dNECA-A<sub>1</sub>R (cMD)</b> | 2.3                    | 0.01 | 1.2                 | 0.7 |

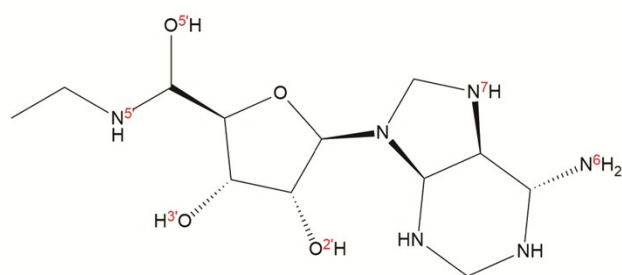

**Fig. S5.** 2D Structure of NECA.

**Table S2.** Averaged distances and standard deviations between the hydroxyl oxygen of the Thr91<sup>3,36</sup> side chain and the N<sup>5'</sup> of NECA, the centers of the phenyl group of Phe171<sup>ECL2</sup> and the purine group of NECA, the carbonyl oxygen of Glu172<sup>ECL2</sup> and the N<sup>6</sup> of NECA, the imidazole  $\epsilon$ -nitrogen of His251<sup>6,52</sup> and the O<sup>5'</sup> of NECA, hydrogen bond Hbond1 between the acylamino  $\delta$ 1-oxygen of Asn254<sup>6,55</sup> and the N<sup>6</sup> of NECA (Hbond1), the acylamino  $\delta$ 2-nitrogen of Asn254<sup>6,55</sup> and the N<sup>7</sup> of NECA (Hbond2), the distance between the hydroxyl oxygen of Thr277<sup>7,42</sup> and the O<sup>3'</sup> of NECA and the distance between the imidazole  $\epsilon$ -nitrogen of His278<sup>7,43</sup> and O<sup>2'</sup> of NECA in the three parallel GaMD simulations.

| Residue                         | P <sub>1</sub> of NECA-A <sub>1</sub> R |       | P <sub>1</sub> of dNECA-A <sub>1</sub> R |      | P <sub>2</sub> of dNECA-A <sub>1</sub> R |       |
|---------------------------------|-----------------------------------------|-------|------------------------------------------|------|------------------------------------------|-------|
|                                 | Average                                 | SD    | Average                                  | SD   | Average                                  | SD    |
| Thr91 <sup>3,36</sup>           | 3.5                                     | 0.7   | 3.0                                      | 0.02 | 3.0                                      | 0.01  |
| Phe171 <sup>ECL2</sup>          | 4.0                                     | 0.1   | 3.8                                      | 0.1  | 4.0                                      | 0.03  |
| Glu172 <sup>ECL2</sup>          | 4.5                                     | 1.1   | 3.2                                      | 0.01 | 3.3                                      | 0.1   |
| His251 <sup>6,52</sup>          | 2.9                                     | 0.03  | 3.0                                      | 0.04 | 2.9                                      | 0.01  |
| Asn254 <sup>6,55</sup> (Hbond1) | 2.9                                     | 0.01  | 2.9                                      | 0.01 | 2.9                                      | 0.004 |
| Asn254 <sup>6,55</sup> (Hbond2) | 3.1                                     | 0.002 | 3.1                                      | 0.01 | 3.1                                      | 0.01  |
| Thr277 <sup>7,42</sup>          | 3.1                                     | 0.1   | 3.7                                      | 0.6  | 2.8                                      | 0.01  |
| His278 <sup>7,43</sup>          | 3.1                                     | 0.4   | 4.3                                      | 0.8  | 3.2                                      | 0.2   |

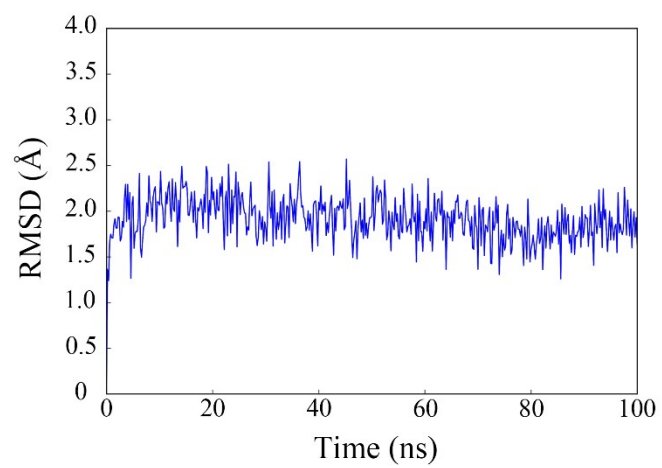

**Fig. S6.** Time dependences of RMSD of NECA respect to the relative to the docking pose for the NECA-A<sub>1</sub>R-M system in the cMD simulation.

**Table S3.** Average number of water molecules in the G-protein binding crevice of the inactive and active states of A<sub>1</sub>R.

| System                 | P <sub>1</sub>  |     | P <sub>2</sub>  |     |
|------------------------|-----------------|-----|-----------------|-----|
|                        | Average         | SD  | Average         | SD  |
| NECA-A <sub>1</sub> R  | 15              | 1.5 | <sup>a</sup> 20 | 0.6 |
| dNECA-A <sub>1</sub> R | <sup>b</sup> 22 | 1.7 | 18              | 0.6 |

<sup>a</sup>The snapshots of the three parallel GaMD simulations in 260-290 ns, 110-140 ns, and 200-230 ns which correspond to the active state for the NECA-A<sub>1</sub>R system are extracted from the trajectories to calculate the average number of water molecules here.

<sup>b</sup>The snapshots of the three parallel GaMD simulations in 235-265 ns, 130-160 ns and 230-260 ns which correspond to the active state for the dNECA-A<sub>1</sub>R system are extracted from the trajectories to calculate the average number of water molecules here.

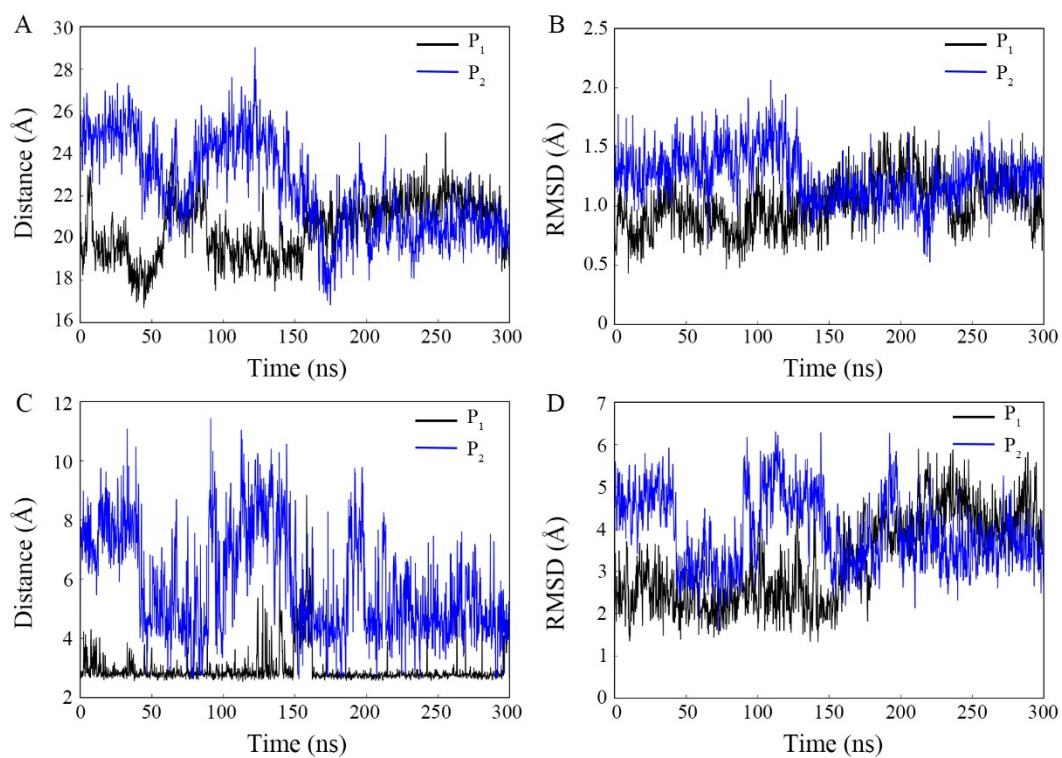

**Fig. S7.** Time dependences of (A) TM3-TM6 distance, (B) RMSD of the DRY motif relative to the inactive starting structure, (C) the N--O distance between the guanidinium of Arg105<sup>3.50</sup>/Arg108<sup>3.53</sup> and the carboxyl of Glu229<sup>6.30</sup> and (D) RMSD of the KxxK motif relative to the inactive starting structure in the GaMD simulation of the second NECA-A<sub>1</sub>R trajectory.

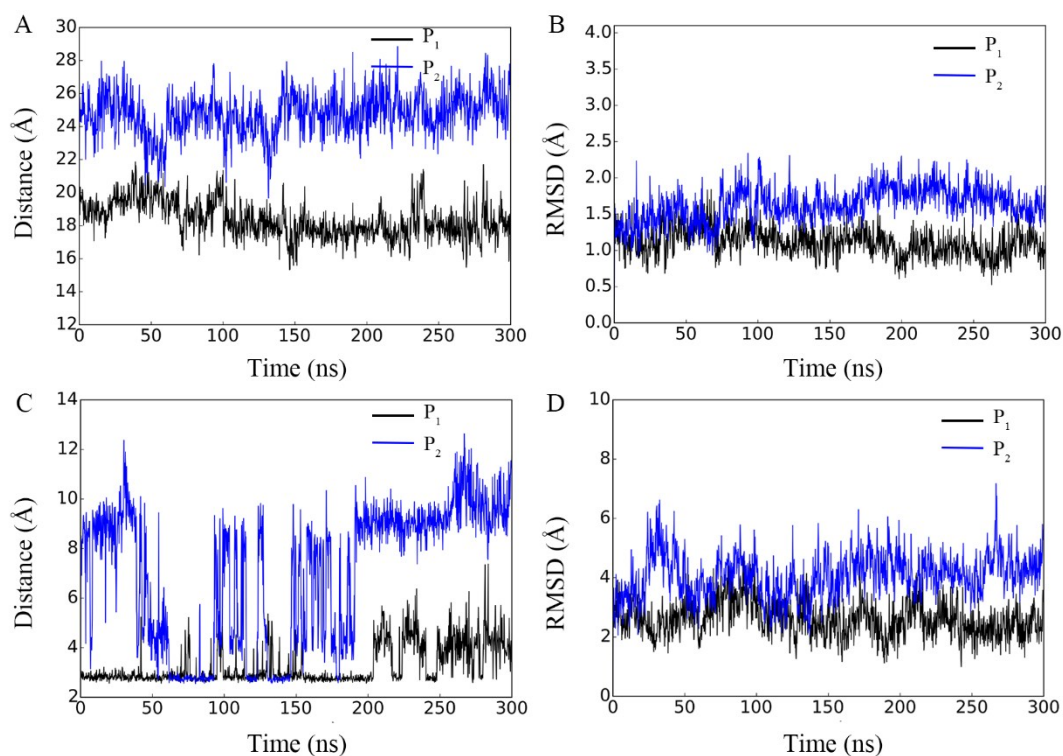

**Fig. S8.** Time dependences of (A) TM3-TM6 distance, (B) RMSD of the DRY motif relative to the inactive starting structure, (C) the N--O distance between the guanidinium of Arg105<sup>3.50</sup>/Arg108<sup>3.53</sup> and the carboxyl of Glu229<sup>6.30</sup> and (D) RMSD of the KxxK motif relative to the inactive starting structure in the GaMD simulation of the third NECA-A<sub>1</sub>R trajectory.

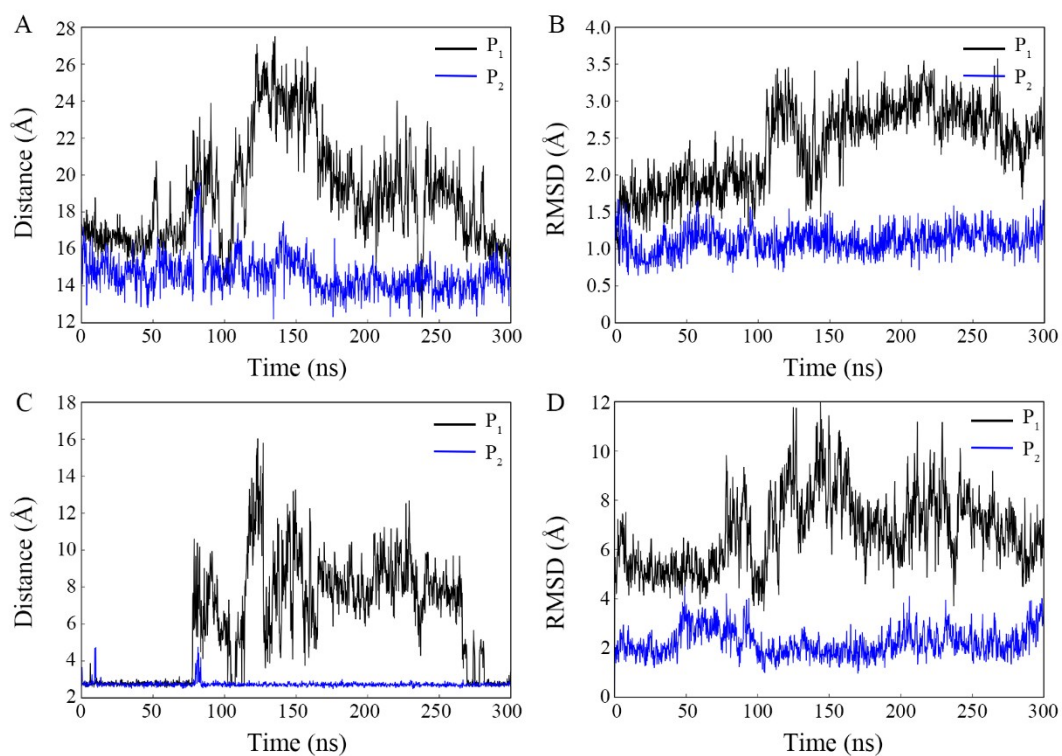

**Fig. S9.** Time dependences of (A) TM3-TM6 distance, (B) RMSD of the DRY motif relative to the inactive starting structure, (C) the N--O distance between the guanidinium of Arg105<sup>3.50</sup>/Arg108<sup>3.53</sup> and the carboxyl of Glu229<sup>6.30</sup> and (D) RMSD of the KxxK motif relative to the inactive starting structure in the GaMD simulation of the second dNECA-A<sub>1</sub>R trajectory.



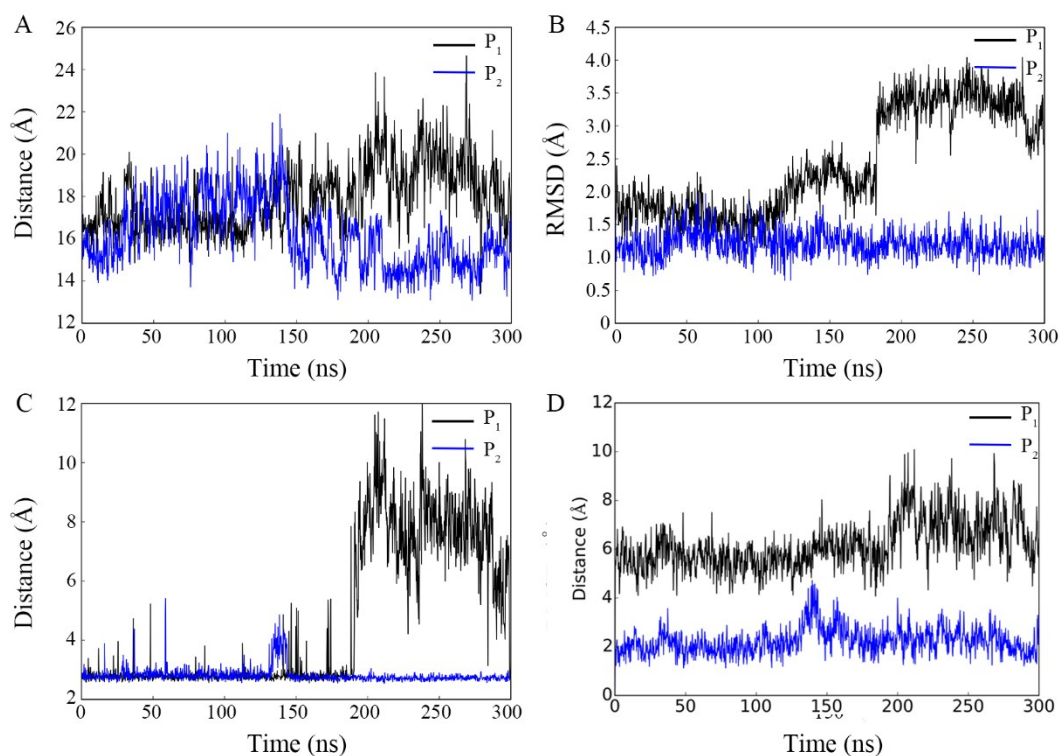

**Fig. S10.** Time dependences of (A) TM3-TM6 distance, (B) RMSD of the DRY motif relative to the inactive starting structure, (C) the N--O distance between the guanidinium of Arg105<sup>3.50</sup>/Arg108<sup>3.53</sup> and the carboxyl of Glu229<sup>6.30</sup> and (D) RMSD of the KxxK motif relative to the inactive starting structure in the GaMD simulation of the third dNECA-A<sub>1</sub>R trajectory.

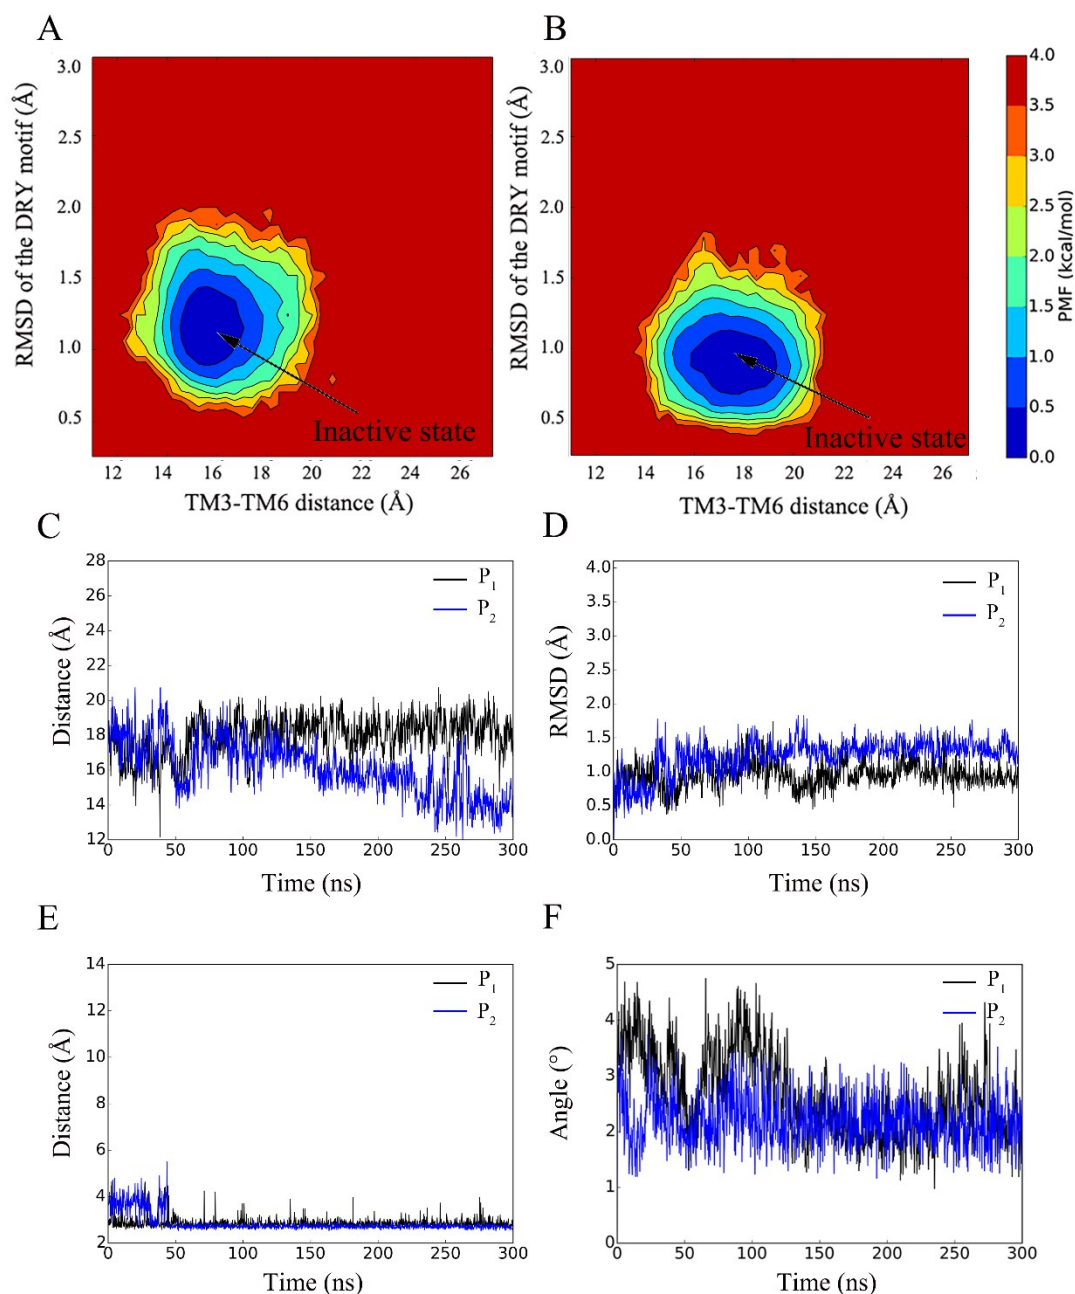

**Fig. S11.** Potential of mean force (PMF) calculated for the TM3-TM6 distance vs. the RMSD of the DRY motif relative to the inactive starting structure for (A) P<sub>1</sub> and (B) P<sub>2</sub> of the apo-A<sub>1</sub>R system. Time dependences of the (C) TM3-TM6 distance, (D) RMSD of the DRY motif relative to the inactive starting structure, (E) N--O distance between the guanidinium of Arg105<sup>3.50</sup>/Arg108<sup>3.53</sup> and the carboxyl of Glu229<sup>6.30</sup> and (F) RMSD of the KxxK motif relative to the inactive starting structure in the GaMD simulation of the apo-A<sub>1</sub>R system.

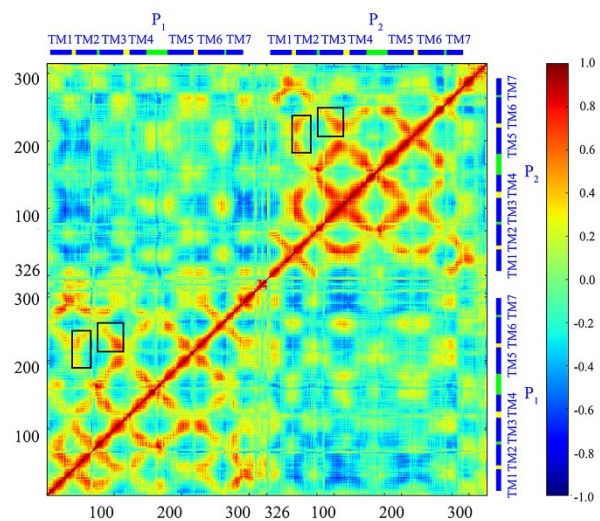

**Fig. S12.** Dynamic cross-correlations map of the apo-A<sub>1</sub>R system in the GaMD simulations.

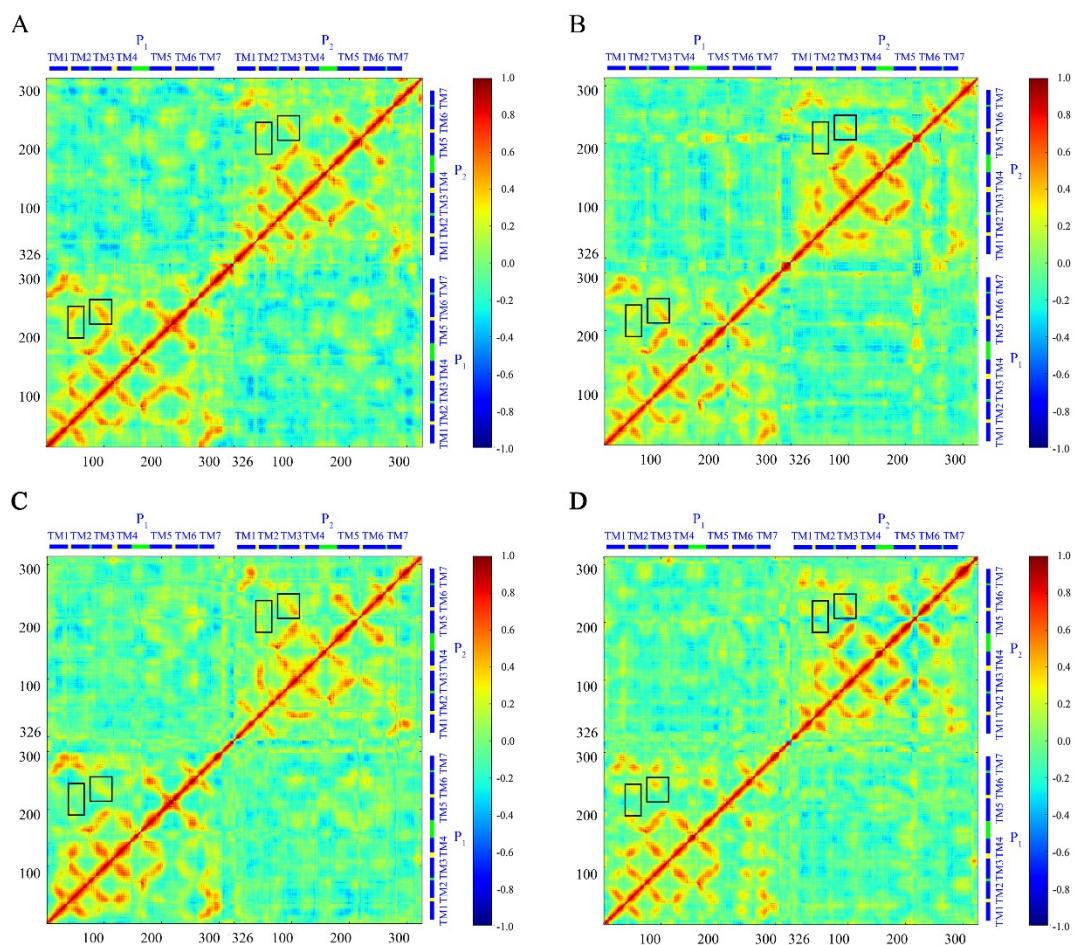

**Fig. S13.** Dynamic cross-correlations map of the (A) NECA-A<sub>1</sub>R based on the snapshots in 110-140 ns of the second NECA-A<sub>1</sub>R trajectory, (B) NECA-A<sub>1</sub>R based on the snapshots in 200-230 ns of the third NECA-A<sub>1</sub>R trajectory, (C) dNECA-A<sub>1</sub>R based on the snapshots in 130-160 ns of the second dNECA-A<sub>1</sub>R trajectory, and (D) dNECA-A<sub>1</sub>R based on the snapshots in 230-260 ns of the second NECA-A<sub>1</sub>R trajectory in the GaMD simulations.

**Table S4.** The highly correlated residues with the absolute values of correlation coefficients larger than 0.6 for the receptor in the NECA-A<sub>1</sub>R and dNECA-A<sub>1</sub>R systems.

| <i>System</i>               | <i>P<sub>1</sub></i>              | <i>P<sub>2</sub></i>               |
|-----------------------------|-----------------------------------|------------------------------------|
| <b>NECA-A<sub>1</sub>R</b>  | 15-28 in TM1 and 282-287 in TM7   |                                    |
|                             | 20-35 in TM1 and 49-64 in TM2     |                                    |
|                             | 42-52 in TM2 and 94-109 in TM3    |                                    |
|                             | 42-52 in TM2 and 229-238 in TM6   | 15-19 in TM1 and 51-62 in TM2      |
|                             | 44-54 in TM2 and 125-133 in TM4   | 16-29 in TM1 and 278-284 in TM7    |
|                             | 47-51 in TM2 and 200-205 in TM5   | 66-72 in TM2 and 168-170 in ECL2   |
|                             | 52-57 in TM2 and 281-286 in TM7   | 76-82 in TM3 and 166-174 in ECL2   |
|                             | 76-82 in TM3 and 167-176 in ECL2  | 52-57 in TM2 and 281-285 in TM7    |
|                             | 88-101 in TM3 and 132-143 in TM4  | 86-94 in TM3 and 132-143 in TM4    |
|                             | 93-109 in TM3 and 124-130 in TM4  | 143-150 in TM4 and 173-183 in TM5  |
|                             | 96-110 in TM3 and 193-208 in TM5  | 178-183 in TM5 and 253-258 in TM6  |
|                             | 98-110 in TM3 and 226-242 in TM6  | 205-212 in TM5 and 225-230 in TM5  |
|                             | 135-155 in TM4 and 174-189 in TM5 |                                    |
|                             | 177-188 in TM5 and 251-261 in TM6 |                                    |
|                             | 204-209 in TM5 and 225-238 in TM6 |                                    |
|                             | 247-254 in TM6 and 274-277 in TM7 |                                    |
|                             |                                   | 17-35 in TM1 and 44-64 in TM2      |
|                             |                                   | 18-35 in TM1 and 275-291 in TM7    |
|                             |                                   | 44-62 in TM2 and 90-108 in TM3     |
|                             |                                   | 44-52 in TM2 and 200-204 in TM5    |
|                             |                                   | 44-55 in TM2 and 230-240 in TM6    |
| <b>dNECA-A<sub>1</sub>R</b> | 15-35 in TM1 and 49-64 in TM2     | 46-50 in TM2 and 124-128 in TM4    |
|                             | 19-35 in TM1 and 279-289 in TM7   | 48-63 in TM2 and 278-290 in TM7    |
|                             | 46-55 in TM2 and 92-108 in TM3    | 66-72 in TM2 and 167-173 in ECL2   |
|                             | 50-62 in TM2 and 87-90 in TM3     | 77-88 in TM3 and 165-180 in ECL2   |
|                             | 45-54 in TM2 and 123-135 in TM4   | 77-100 in TM3 and 127-145 in TM4   |
|                             | 65-88 in TM2 and 164-176 in ECL2  | 92-111 in TM3 and 192-207 in TM5   |
|                             | 50-63 in TM2 and 278-285 in TM7   | 95-110 in TM3 and 226-244 in TM6   |
|                             | 81-104 in TM3 and 124-145 in TM4  | 134-153 in TM4 and 171-189 in TM5  |
|                             | 132-152 in TM4 and 171-189 in TM5 | 146-149 in ECL2 and 254-259 in TM6 |
|                             | 176-190 in TM5 and 247-258 in TM6 | 172-191 in TM5 and 248-260 in TM6  |
|                             | 205-215 in TM5 and 219-230 in TM6 | 247-254 in TM6 and 269-277 in TM7  |
|                             |                                   |                                    |

**Table S5.** The networks in the intracellular sides of the P<sub>1</sub> and P<sub>2</sub> in the GaMD simulation of the second NECA-A<sub>1</sub>R and dNECA-A<sub>1</sub>R trajectory.

| NECA-A <sub>1</sub> R |                 |                 | dNECA-A <sub>1</sub> R |                 |                 |
|-----------------------|-----------------|-----------------|------------------------|-----------------|-----------------|
|                       | P <sub>1</sub>  | P <sub>2</sub>  | P <sub>1</sub>         | P <sub>2</sub>  |                 |
| Leu99 – Ile199        | Tyr106 – Ile199 | Ala102 – Ile199 | Tyr106 – Ile199        | Leu99 – Met196  | Arg108 – Glu229 |
| Ala102 – Ile199       | Tyr106 – Glu202 | Arg105 – Val203 |                        | Ala102 – Met196 |                 |
| Ala102 – Tyr200       | Tyr106 – Val203 | Tyr106 – Ile199 |                        | Ala102 – Ile199 |                 |
| Val103 – Ile199       | Arg108 – Glu229 | Tyr106 – Glu202 |                        | Ala102 – Tyr200 |                 |
| Arg105 – Val203       | Val109 – Val203 | Tyr106 – Val203 |                        | Val103 – Ile199 |                 |
| Arg105 – Ile232       | Val109 – Leu206 | Val109 – Val203 |                        | Arg105 – Val203 |                 |
| Arg105 – Ala233       | Lys110 – Leu206 | Val109 – Leu206 |                        | Tyr106 – Ile199 |                 |
| Arg105 – Leu236       |                 |                 |                        | Tyr106 – Val203 |                 |

**Table S6.** The networks in the intracellular sides of the P<sub>1</sub> and P<sub>2</sub> in the GaMD simulation of the third NECA-A<sub>1</sub>R and dNECA-A<sub>1</sub>R trajectory.

| NECA-A <sub>1</sub> R |                 |                 |                 | dNECA-A <sub>1</sub> R |                 |
|-----------------------|-----------------|-----------------|-----------------|------------------------|-----------------|
|                       | P <sub>1</sub>  | P <sub>2</sub>  | P <sub>1</sub>  |                        | P <sub>2</sub>  |
| Ala102 – Ile199       | Arg108 – Glu229 | Ala102 – Ile199 | Ala102 – Ile199 | Leu99 – Met196         | Tyr106 – Ile199 |
| Ala102 – Tyr200       | Val109 – Leu206 | Val103 – Ile199 | Val103 – Ile199 | Ala102 – Met196        | Tyr106 – Glu202 |
| Val103 – Ile199       | Val109 – Ile207 | Ala102 – Met196 | Tyr106 – Ile199 | Ala102 – Ile199        | Tyr106 – Val203 |
| Arg105 – Val203       | Lys110 – Leu206 |                 |                 | Ala102 – Tyr200        | Arg108 – Glu225 |
| Tyr106 – Ile199       |                 |                 |                 | Val103 – Ile199        | Val109 – Ile207 |
| Tyr106 – Glu202       |                 |                 |                 | Arg105 – Tyr200        | Arg108 – Glu229 |
| Tyr106 – Val203       |                 |                 |                 | Arg105 – Val203        | Val109 – Glu229 |
| Tyr106 – Leu206       |                 |                 |                 | Arg105 – Glu229        | Lys110 – Leu206 |

**Table S7.** Averaged values and standard deviations of the distances between COMs of P<sub>1</sub> and P<sub>2</sub> in the apo-A<sub>1</sub>R, NECA-A<sub>1</sub>R, and dNECA-A<sub>1</sub>R systems over the three parallel GaMD trajectories.

|                                         | apo-A <sub>1</sub> R<br>(Å) |     | NECA-A <sub>1</sub> R<br>(Å) |     | dNECA-A <sub>1</sub> R<br>(Å) |     |
|-----------------------------------------|-----------------------------|-----|------------------------------|-----|-------------------------------|-----|
|                                         | Average                     | SD  | Average                      | SD  | Average                       | SD  |
| P <sub>1</sub> -P <sub>2</sub> distance | 33.3                        | 0.2 | 35.2                         | 0.7 | 35.5                          | 0.3 |
